# Supplementary material
Source: PubMed Central journal article supplement (PMC4286618)
Supplement: mmc1.pdf [file mmc1.pdf]

# THE LANCET

## **Supplementary appendix**

This appendix formed part of the original submission and has been peer reviewed. We post it as supplied by the authors.

Supplement to: Bogoch II, Creatore MI, Cetron MS, et al. Assessment of the potential for international dissemination of Ebola virus via commercial air travel during the 2014 west African outbreak. *Lancet* 2014; published online Oct 21. [http://dx.doi.org/10.1016/S0140-6736\(14\)61828-6](http://dx.doi.org/10.1016/S0140-6736(14)61828-6).

Appendix A: Sensitivity analyses\* looking at impact of increased case burden and reduced air traffic flows on potential risk of Ebola case exportation from Guinea (A1), Liberia (A2) and Sierra Leone (A3). Estimates represent cumulative number of outbound travellers between September and December, 2014.

**A1: Guinea**

| Case burden** scenarios               | Cumulative number of outbound infected travellers under selected travel restriction scenarios |                             |                             |
|---------------------------------------|-----------------------------------------------------------------------------------------------|-----------------------------|-----------------------------|
|                                       | Normal air travel volume                                                                      | 50% reduction in air travel | 75% reduction in air travel |
| 2x case burden                        | 2·9                                                                                           | 1·5                         | 0·7                         |
| 5x case burden                        | 7·3                                                                                           | 3·7                         | 1·8                         |
| 10x case burden                       | 14·6                                                                                          | 7·3                         | 3·7                         |
| Exponentially† increasing case burden | 45·3                                                                                          | 22·7                        | 11·3                        |

\*Model assumptions include: EV disease risk is equally distributed across the population; an individuals' risk of EV infection is independent of the probability of international air travel. Projected numbers of EV infected, internationally outbound travelers are a cumulative total between September to December using the following formula: [number of 'active cases'/country population] x monthly number of international outbound air travelers). Travel volumes are based on IATA reported outbound, passenger-level monthly traveler volumes from Guinea, Liberia and Sierra Leone, between September-December 2013.

\*\*Case data are based on WHO reported active case counts as of September 21<sup>st</sup>, 2014.

†Exponential model based on WHO Ebola Response Team, NEJM, 2014 [6].

## A2: Liberia

| Case burden** scenarios               | Cumulative number of outbound infected travellers under selected travel restriction scenarios |                             |                             |
|---------------------------------------|-----------------------------------------------------------------------------------------------|-----------------------------|-----------------------------|
|                                       | Normal air travel volume                                                                      | 50% reduction in air travel | 75% reduction in air travel |
| 2x case burden                        | 32.1                                                                                          | 16.1                        | 8.0                         |
| 5x case burden                        | 80.3                                                                                          | 40.1                        | 20.1                        |
| 10x case burden                       | 160.5                                                                                         | 80.3                        | 40.1                        |
| Exponentially† increasing case burden | 52.1                                                                                          | 26.0                        | 13.0                        |

\*Model assumptions include: EV disease risk is equally distributed across the population; an individuals' risk of EV infection is independent of the probability of international air travel. Projected numbers of EV infected, internationally outbound travelers are a cumulative total between September to December using the following formula: [number of 'active cases'/country population] x monthly number of international outbound air travelers). Travel volumes are based on IATA reported outbound, passenger-level monthly traveler volumes from Guinea, Liberia and Sierra Leone, between September-December 2013.

\*\*Case data are based on WHO reported active case counts as of September 21<sup>st</sup>, 2014.

†Exponential model based on WHO Ebola Response Team, NEJM, 2014 [6].

### A3: Sierra Leone

| Case burden**<br>scenarios                  | Cumulative number of outbound infected<br>travellers under selected travel restriction<br>scenarios |                                   |                                   |
|---------------------------------------------|-----------------------------------------------------------------------------------------------------|-----------------------------------|-----------------------------------|
|                                             | Normal air<br>travel<br>volume                                                                      | 50%<br>reduction in<br>air travel | 75%<br>reduction in<br>air travel |
| 2x case burden                              | 10·9                                                                                                | 5·5                               | 2·7                               |
| 5x case burden                              | 27·3                                                                                                | 13·7                              | 6·8                               |
| 10x case<br>burden                          | 54·6                                                                                                | 27·3                              | 13·7                              |
| Exponentially†<br>increasing case<br>burden | 7·5                                                                                                 | 3·7                               | 1·9                               |

\*Model assumptions include: EV disease risk is equally distributed across the population; an individuals' risk of EV infection is independent of the probability of international air travel. Projected numbers of EV infected, internationally outbound travelers are a cumulative total between September to December using the following formula: [number of 'active cases'/country population] x monthly number of international outbound air

travelers). Travel volumes are based on IATA reported outbound, passenger-level monthly traveler volumes from Guinea, Liberia and Sierra Leone, between September-December 2013.

\*\*Case data are based on WHO reported active case counts as of September 21<sup>st</sup>, 2014.

†Exponential model based on WHO Ebola Response Team, NEJM, 2014 [6].

Appendix B: Final destinations (top 25) of travelers departing Guinea, Liberia and Sierra Leone from September to December, 2013

| City         | Country           | Traveler<br>Volume | % Total<br>Volume | Cumulative<br>% |
|--------------|-------------------|--------------------|-------------------|-----------------|
| Accra        | Ghana             | 25,267             | 17.5%             | 17.5%           |
| Dakar        | Senegal           | 20,805             | 14.4%             | 31.9%           |
| London       | United<br>Kingdom | 11,063             | 7.7%              | 39.6%           |
| Banjul       | Gambia            | 9,849              | 6.8%              | 46.4%           |
| Paris        | France            | 8,647              | 6.0%              | 52.4%           |
| Abidjan      | Cote D'Ivoire     | 8,266              | 5.7%              | 58.1%           |
| Casablanca   | Morocco           | 7,514              | 5.2%              | 63.3%           |
| Brussels     | Belgium           | 5,541              | 3.8%              | 67.1%           |
| Lagos        | Nigeria           | 4,046              | 2.8%              | 69.9%           |
| Bamako       | Mali              | 3,680              | 2.5%              | 72.5%           |
| Nairobi      | Kenya             | 2,371              | 1.6%              | 74.1%           |
| Beijing      | China             | 2,095              | 1.5%              | 75.6%           |
| Beirut       | Lebanon           | 1,706              | 1.2%              | 76.8%           |
| Mumbai       | India             | 1,348              | 0.9%              | 77.7%           |
| Bissau       | Guinea-Bissau     | 1,340              | 0.9%              | 78.6%           |
| Johannesburg | South Africa      | 1,296              | 0.9%              | 79.5%           |
| Dubai        | United Arab       | 911                | 0.6%              | 80.1%           |

|             |               |     |      |       |
|-------------|---------------|-----|------|-------|
|             | Emir          |     |      |       |
| Nouakchott  | Mauritania    | 870 | 0·6% | 80·7% |
| Guangzhou   | China         | 804 | 0·6% | 81·3% |
| Addis Ababa | Ethiopia      | 794 | 0·5% | 81·9% |
| New York    | United States | 788 | 0·5% | 82·4% |
| Delhi       | India         | 751 | 0·5% | 82·9% |
| Montreal    | Canada        | 610 | 0·4% | 83·3% |
| Ouagadougou | Burkina Faso  | 583 | 0·4% | 83·7% |
| Wuhan       | China         | 550 | 0·4% | 84·1% |



Appendix C: Final destinations (top 25) of travelers departing Lagos and Port Harcourt, Nigeria from September to December, 2013

| City         | Country          | Traveler<br>Volume | % Total<br>Volume | Cumulative<br>% |
|--------------|------------------|--------------------|-------------------|-----------------|
| London       | United Kingdom   | 92,092             | 17.0%             | 17.0%           |
| Dubai        | United Arab Emir | 46,670             | 8.6%              | 25.7%           |
| Accra        | Ghana            | 38,437             | 7.1%              | 32.8%           |
| Johannesburg | South Africa     | 37,239             | 6.9%              | 39.7%           |
| New York     | United States    | 11,707             | 2.2%              | 41.8%           |
| Douala       | Cameroon         | 11,131             | 2.1%              | 43.9%           |
| Houston      | United States    | 10,894             | 2.0%              | 45.9%           |
| Paris        | France           | 10,817             | 2.0%              | 47.9%           |
| Guangzhou    | China            | 9,435              | 1.7%              | 49.6%           |
| Amsterdam    | Netherlands      | 8,784              | 1.6%              | 51.3%           |
| Abu Dhabi    | United Arab Emir | 8,497              | 1.6%              | 52.8%           |
| Mumbai       | India            | 7,826              | 1.4%              | 54.3%           |
| Nairobi      | Kenya            | 7,272              | 1.3%              | 55.6%           |
| Delhi        | India            | 6,926              | 1.3%              | 56.9%           |
| Addis Ababa  | Ethiopia         | 6,744              | 1.2%              | 58.1%           |
| Beijing      | China            | 6,398              | 1.2%              | 59.3%           |
| Istanbul     | Turkey           | 5,955              | 1.1%              | 60.4%           |
| Beirut       | Lebanon          | 5,688              | 1.1%              | 61.5%           |

|              |               |       |      |       |
|--------------|---------------|-------|------|-------|
| Atlanta      | United States | 5,430 | 1.0% | 62.5% |
| Dakar        | Senegal       | 5,260 | 1.0% | 63.5% |
| Libreville   | Gabon         | 5,120 | 0.9% | 64.4% |
| Cape Town    | South Africa  | 4,908 | 0.9% | 65.3% |
| Kuala Lumpur | Malaysia      | 4,845 | 0.9% | 66.2% |
| Abidjan      | Cote D'Ivoire | 4,518 | 0.8% | 67.0% |
| Rome         | Italy         | 4,358 | 0.8% | 67.9% |
